# 1 **Unraveling the critical growth factors for stable cultivation of** 2 **(nano-sized) Micrarchaeota**

3  
4 Susanne Krause [1]\*, Sabrina Gfrerer [2]\*, Carsten Reuse [7,8], Nina Dombrowski [3], Laura  
5 Villanueva [3,4], Boyke Bunk [5], Cathrin Spröer [5], Thomas R. Neu [6], Ute Kuhlicke [6],  
6 Kerstin Schmidt-Hohagen [7,8], Karsten Hiller [7,8], Reinhard Rachel [9] Anja Spang [3,10]  
7 and Johannes Gescher [1,2]

- 8  
9  
10  
11  
12 [1] Department of Applied Biology, Karlsruhe Institute of Technology (KIT), Karlsruhe,  
13 Germany  
14 [2] Institute for Biological Interfaces, Karlsruhe Institute of Technology (KIT), Eggenstein-  
15 Leopoldshafen, Germany  
16 [3] Department of Marine Microbiology and Biogeochemistry, NIOZ, Royal Netherlands  
17 Institute for Sea Research, Den Burg, The Netherlands  
18 [4] Department of Earth Sciences, Faculty of Geosciences, Utrecht University, Utrecht, The  
19 Netherlands  
20 [5] Leibniz Institute DSMZ, Braunschweig, Germany  
21 [6] Helmholtz-Centre for Environmental Research UFZ, Magdeburg, Germany  
22 [7] Bioinformatics & Biochemistry, Technische Universität Braunschweig, Braunschweig,  
23 Germany  
24 [8] Braunschweig Integrated Centre for Systems Biology (BRICS), Technische Universität  
25 Braunschweig, Braunschweig, Germany  
26 [9] Center for Electron Microscopy, University of Regensburg, Regensburg, Germany  
27 [10] Department of Cell- and Molecular Biology, Science for Life Laboratory, Uppsala  
28 University, SE-75123, Uppsala, Sweden  
29  
30  
31  
32  
33  
34  
35  
36  
37  
38

39 Corresponding author:  
40 Prof. Dr. Johannes Gescher  
41 Karlsruhe Institute of Technology  
42 Institute of Applied Biosciences  
43 Department of applied biology  
44 Phone: ++49721-608-41940  
45 FAX: ++49721-608-41941  
46 E-mail: [johannes.gescher@kit.edu](mailto:johannes.gescher@kit.edu)  
47

48 \* These authors contributed equally to this work.

49 **Abstract**

50 Micrarchaeota are members of the archaeal DPANN superphylum. These so far poorly  
51 characterized archaea have been found to have reduced genomes and likely depend on  
52 interactions with host organisms for growth and survival. Here we report on the enrichment of  
53 the first stable co-culture of a member of the Micrarchaeota together with its host, as well as  
54 the isolation of the latter. Electron microscopic analysis suggest that growth is dependent on  
55 the physical interaction of the two organisms within a biofilm. The interaction seems to be  
56 ensured by the necessity to grow in form of a biofilm. Furthermore, transcriptomic analyses  
57 indicate a shift towards biofilm formation of the host as a result of co-cultivation. Finally,  
58 genomic, metabolomic, extracellular polymeric substance (EPSs) and lipid content analyses  
59 reveal that the Micrarchaeon symbiont relies on the acquisition of metabolites from its host and  
60 thereby provide first insights into the basis of symbiont-host interactions.

## 61 **Introduction**

62 In 2002, Huber and colleagues described a novel nano-sized archaeon, *Nanoarchaeum equitans*  
63 <sup>1</sup>. Later, metagenomic data of environmental samples revealed that the Nanoarchaeota are part  
64 of a tentative superphylum of nano-sized archaea now referred to as DPANN – an acronym on  
65 its first members lineages, the Diapherotrites, Parvarchaeota, Aenigmarchaeota,  
66 Nanoarchaeota, and Nanohaloarchaeota <sup>2</sup>. Most DPANN representatives have reduced genomes  
67 and are thought to comprise a diversity of potential archaeal symbionts. Besides the name-  
68 giving phyla, the DPANN also include the Woese- and Pacearchaeota <sup>3</sup>, Huberarchaeota <sup>4</sup>,  
69 Micrarchaeota <sup>5</sup>, Altiarchaeota <sup>6</sup>, Undinarchaeota <sup>7</sup> and Mamarchaeota <sup>8,9</sup> as well as several so  
70 far undefined phyla <sup>8,10</sup>. Nano-sized archaea are globally distributed and can comprise non-  
71 negligible proportions of microbial communities <sup>11</sup>. Yet only a few representatives have been  
72 enriched under laboratory conditions <sup>1,12–17</sup>. Current genomic data suggest that most DPANN  
73 archaea have reduced genomes, limited metabolic capabilities and various auxotrophies and  
74 might depend on interactions with other community members. The extent of genome reduction  
75 varies within the DPANN members. For instance, marine Nanoarchaeota are characterized by  
76 highly reduced genomes of about 0.5 Mbp and seem to represent ectoparasites that are strongly  
77 dependent on their host <sup>1</sup>. On the other hand, the first members of the Nanohaloarchaeota and  
78 Micrarchaeota <sup>5</sup> have larger genome sizes and seem metabolically more flexible <sup>14–16,18</sup>; yet  
79 cultivated Nanohaloarchaeota representatives are nevertheless host-dependent <sup>16,17</sup>. While  
80 recent work has provided more insights into symbiotic interactions characterizing certain  
81 representatives of the DPANN <sup>16,19</sup>, additional model systems remain to be established.

82 We have recently succeeded in enriching a member of the Micrarchaeota in a  
83 community of four different microorganisms <sup>15</sup>. Here, we report the isolation of the first stable  
84 coculture of this Micrarchaeon together with its host, a previously unknown member of the  
85 Thermoplasmatales, as well as the isolation of the latter. This allowed us to conduct experiments

- 86 aiming to understand the interaction of the two organisms and the response of the
- 87 Thermoplasmatales member to growth in coculture with the Micrarchaeon.

## 88 **Results and discussion**

### 89 **Isolation of the A\_DKE/B\_DKE co-culture and pure culture of B\_DKE**

90 Originally, we referred to the putative symbionts belonging to the Micrarchaeota and  
91 Thermoplasmatales as A\_DKE and B\_DKE, respectively<sup>15</sup>. Based on the herein purified co-  
92 culture, the isolation of the Thermoplasmatales host the reconstruction of genome sequences of  
93 both organisms, we propose the names ‘*Candidatus* Micrarchaeum harzensis’ *sp. nov.* (N.L.  
94 masc./fem. adj. *harzensis*, pertaining to the German region of the Harz Mountains, where the  
95 organism was isolated) and ‘*Candidatus* Scheffleriplasma hospitalis’ *gen. nov. sp. nov.*  
96 (Scheffler.i.plas´ma. N.L. gen. masc. n. *scheffleri* of Scheffler, named in honor of the geologist  
97 Dr. Horst Scheffler and in recognition of his work on mine geology and commitment to our  
98 work; Gr. neut. n. *plasma* something shaped or molded; hos.pi.ta’lis. L. masc.  
99 adj. *hospitalis* relating to a guest, hospitable, referring to its ability to serve as a host for  
100 *Candidatus* ‘Micrarchaeum harzensis’). For brevity we will stick to the abbreviation A\_DKE  
101 and B\_DKE throughout this manuscript.

102 In order to obtain a better understanding of the interactions between A\_DKE and  
103 B\_DKE we first aimed to obtain a co-culture of the putative symbiont and host organisms, i.e.  
104 purify the original enrichment from a *Cuniculiplasma*-related archaeon referred to as C\_DKE  
105 and a fungus (with *Acidithrix acidophila* as its closest related organism)<sup>15</sup> C\_DKE represented  
106 the minority of the archaea in the enrichment culture and is closely related to an organism  
107 reported to have a low pH optimum of 1.0–1.2<sup>20</sup>. Hence, it was possible to eliminate C\_DKE  
108 by transferring the culture in media with a pH of 2.5, which exceeds its optimal pH range, while  
109 still supporting the growth of A\_DKE and B\_DKE. Secondly, the fungus, which was isolated  
110 and inferred to be psychrophilic/psychrotolerant (data not shown), was successfully eliminated  
111 by incubating the enrichment cultures at 37 °C over three consecutive culture transfers. From  
112 the previous microscopy analysis, it was known that A\_DKE thrives together with B\_DKE in  
113 biofilm-like structures<sup>15</sup>. We discovered that it was possible to enhance the biofilm formation

114 of the host- or helper-organism B\_DKE by lowering the pH-value of the medium from 2.5 to  
115 2.0, which led to robust biofilm formation of the co-culture (Supplementary Figure S1). At the  
116 same time, we were able to isolate B\_DKE by enriching at pH 2.5 for planktonic organisms.

117

### 118 **Genomic potential of A\_DKE and B\_DKE**

119 DNA of the co-culture containing A\_DKE and B\_DKE was sequenced using a combination of  
120 PacBio and Illumina sequencing. For comparison, Illumina sequencing was also performed on  
121 the B\_DKE pure culture. The two organisms have circular chromosomes of 1 959 588 base  
122 pairs (bp) (B\_DKE) and 989 838 bp (A\_DKE), and GC contents of 44.4 % and 45.8 %,  
123 respectively. The genomes of the pure B\_DKE isolate and the strain within the co-culture were  
124 100 % identical, which was important for the later comparative transcriptomic analysis. An  
125 analysis of clusters of orthologous groups (COGs) revealed that A\_DKE contains more proteins  
126 with unknown function (29 %; 300 putative proteins without an arCOG-assignment) relative to  
127 the overall number of genes compared to B\_DKE (20 %; 419 putative proteins without an  
128 arCOG-assignment). The complete genome of A\_DKE confirmed earlier findings<sup>15</sup>, such as  
129 an extremely limited set of genes coding for proteins involved in central carbon metabolism.  
130 We could only detect one gene encoding a putative enzyme of the pentose phosphate pathway  
131 and two genes for putative enzymes of a glycolysis or gluconeogenesis pathways  
132 (Supplementary Table S1). However, we did identify a putative set of genes coding for enzymes  
133 for the conversion of glucose to glycerate, which together comprise four of the seven reactions  
134 of the non-phosphorylative Entner-Doudoroff pathway (Supplementary Table S1). The A\_DKE  
135 genome also contains genes encoding enzymes for the conversion of pyruvate to acetyl-CoA,  
136 though we could not identify candidate proteins for reactions leading from glycerate to  
137 pyruvate. In agreement with our previous study, proteins for almost all steps of the tricarboxylic  
138 acid cycle (TCA) were detected in A\_DKE, and may, through the production of NADH, fuel  
139 an electron transport chain and the generation of a proton gradient for ATP synthase-based ATP

140 production. Gene clusters encoding a full NADH dehydrogenase and an ATP synthase complex  
141 were discovered in the A\_DKE genome. Moreover, we identified genes encoding one subunit  
142 of the cytochrome bc1 complex and two subunits of the cytochrome c oxidase (Supplementary  
143 Table S1). Although the organism might have the ability to generate energy and produce  
144 reducing equivalents, it will be highly dependent on building blocks acquired either from the  
145 environment (or culture medium) or from the partner organism B\_DKE. For instance, A\_DKE  
146 has major gaps in various biosynthesis pathways including for amino acids; the few steps  
147 encoded by A\_DKE comprise the production of aspartate from oxaloacetate, glutamate from  $\alpha$ -  
148 ketoglutarate and phenylalanine from phenylpyruvate. Phenylpyruvate could be produced from  
149 tyrosine, which was taken up from the medium by the co-culture (see below). Other amino acid  
150 biosynthesis pathways could not be detected. Furthermore, genes encoding known amino acid  
151 transporters seem to be absent <sup>8,10</sup> and DNA, RNA, and lipid biosynthesis pathways are  
152 incomplete (see below). Consequently, A\_DKE may acquire certain metabolites or building  
153 blocks directly from its partner B\_DKE through cell-cell interactions as seen in the *Ignococcus*  
154 *hospitalis*/*Nanoarchaeum equitans* system <sup>21,22</sup>. In turn, the dependency of A\_DKE on growth  
155 in a biofilm (see above) may be due to the need to establish cellular contact with its host.

156

### 157 **Impact of growth in co-culture on the B\_DKE transcriptome**

158 To get further insights into the effect of the symbiont on its host, we compared gene expression  
159 levels of B\_DKE with and without co-cultivation with A\_DKE under otherwise identical  
160 growth conditions. In particular, we compared three pure cultures with four co-cultures and  
161 filtered for differentially expressed genes with p-values lower than 0.05 and log2fold changes  
162 higher or lower than 2 or -2. This analysis revealed 15 genes that were differentially expressed  
163 based on these criteria (Table 1).

164

165 Table 1: Differentially expressed genes of B\_DKE in pure culture in comparison to B\_DKE in co-culture with  
166 A\_DKE. The table indicates the gene ID, the description of the expressed protein, the log<sub>2</sub>-fold change, and the  
167 p-value.

| gene ID      | description                                       | log <sub>2</sub> fold change | p-value   |
|--------------|---------------------------------------------------|------------------------------|-----------|
| Thermo_01860 | hypothetical protein                              | -5,42                        | 7,32E-201 |
| Thermo_01798 | hypothetical protein                              | -5,21                        | 6,1E-97   |
| Thermo_00025 | hypothetical protein                              | -4,87                        | 0         |
| Thermo_00444 | 41 kDa flagellin                                  | -4,4                         | 0         |
| Thermo_01859 | 41 kDa flagellin                                  | -4,33                        | 3,06E-87  |
| Thermo_01877 | Pilin/Flagellin family protein                    | -4,06                        | 5,16E-93  |
| Thermo_00680 | putative aminopeptidase 1                         | -4,05                        | 1,29E-292 |
| Thermo_00445 | Putative archaeal flagellar protein C             | -4                           | 0         |
| Thermo_00502 | Hexuronic acid methyltransferase AgIP             | -3,83                        | 1,04E-232 |
| Thermo_00446 | Putative archaeal flagellar protein D/E           | -3,59                        | 0         |
| Thermo_01799 | hypothetical protein                              | -3,23                        | 9,13E-80  |
| Thermo_01144 | Pink FeS protein                                  | -2,88                        | 2,75E-27  |
| Thermo_01181 | Trehalose/maltose import ATP-binding protein Malk | -2,26                        | 1,73E-60  |
| Thermo_00581 | Trehalose/maltose import ATP-binding protein Malk | -2,22                        | 2,51E-77  |
| Thermo_00582 | ABC-type transport system permease component      | -2,13                        | 9,45E-70  |

168

169

170 All of those 15 genes were downregulated in the host B\_DKE in the co-culture  
171 compared to the pure culture of B\_DKE and comprise five genes of or associated with the  
172 B\_DKE archaeellum complex<sup>23</sup>. This suggests a decreased cellular motility of the host in the co-  
173 culture, which is in line with the observed tendency of B\_DKE to form a biofilm in the presence  
174 of A\_DKE. The closest relative of B\_DKE, *Cuniculiplasma divulgatum*, does not contain any  
175 flagella-related genes<sup>24</sup>, whereas the related ‘G-Plasmas’ are described to contain the full *fla*-  
176 operon (*flaBCDEFGHIJ*)<sup>25</sup>. Furthermore, the gene for the hexuronic acid methyltransferase  
177 AgIP, a component of the protein glycosylation was downregulated and may indicate an  
178 alteration of the glycosylation pattern of B\_DKE, as well as influence cell-cell-interaction in  
179 the presence of A\_DKE. It may also change the exopolysaccharide (EPS) matrix of B\_DKE,  
180 which would explain the observed binding differences of some lectins (see below). Three other  
181 downregulated genes code for transport proteins that might be involved in the uptake of  
182 carbohydrate molecules. While the effect of the decreased expression level of these transporters  
183 is unclear, it may be speculated that it could lead to higher availability of certain metabolites in  
184 the medium and support growth of A\_DKE. Other downregulated genes encode hypothetical



185 proteins, a putative aminopeptidase, and an iron-sulfur-protein. Thus far, their potential impact  
186 on the interaction of B\_DKE with A\_DKE remains unclear.

187

### 188 **Metabolomic analysis in the presence and absence of A\_DKE**

189 Next, we performed a metabolomic analysis to be able to compare metabolites in co-culture to  
190 the pure culture and determine whether the presence of A\_DKE changes the pattern of depleted  
191 and produced organic carbon compounds. The growth of B\_DKE in pure culture, estimated on  
192 the change in ferrous iron concentration over time, was faster than in the co-culture  
193 (Supplementary Figure S2). Therefore, we compared samples with equal ferrous iron  
194 concentration (3, 4, and 5 weeks of growth for the pure culture; 5, 6, and 7 weeks of growth for  
195 the co-culture) as they indicate similar growth phases. Figure 1 shows a heatmap representing  
196 all significantly different metabolites ( $p < 0.01$ ) present in the samples at the various time  
197 points. While the majority of the detected compounds changed simultaneously in the pure- and  
198 the co-culture throughout the growth phases, some metabolites showed different patterns.

199

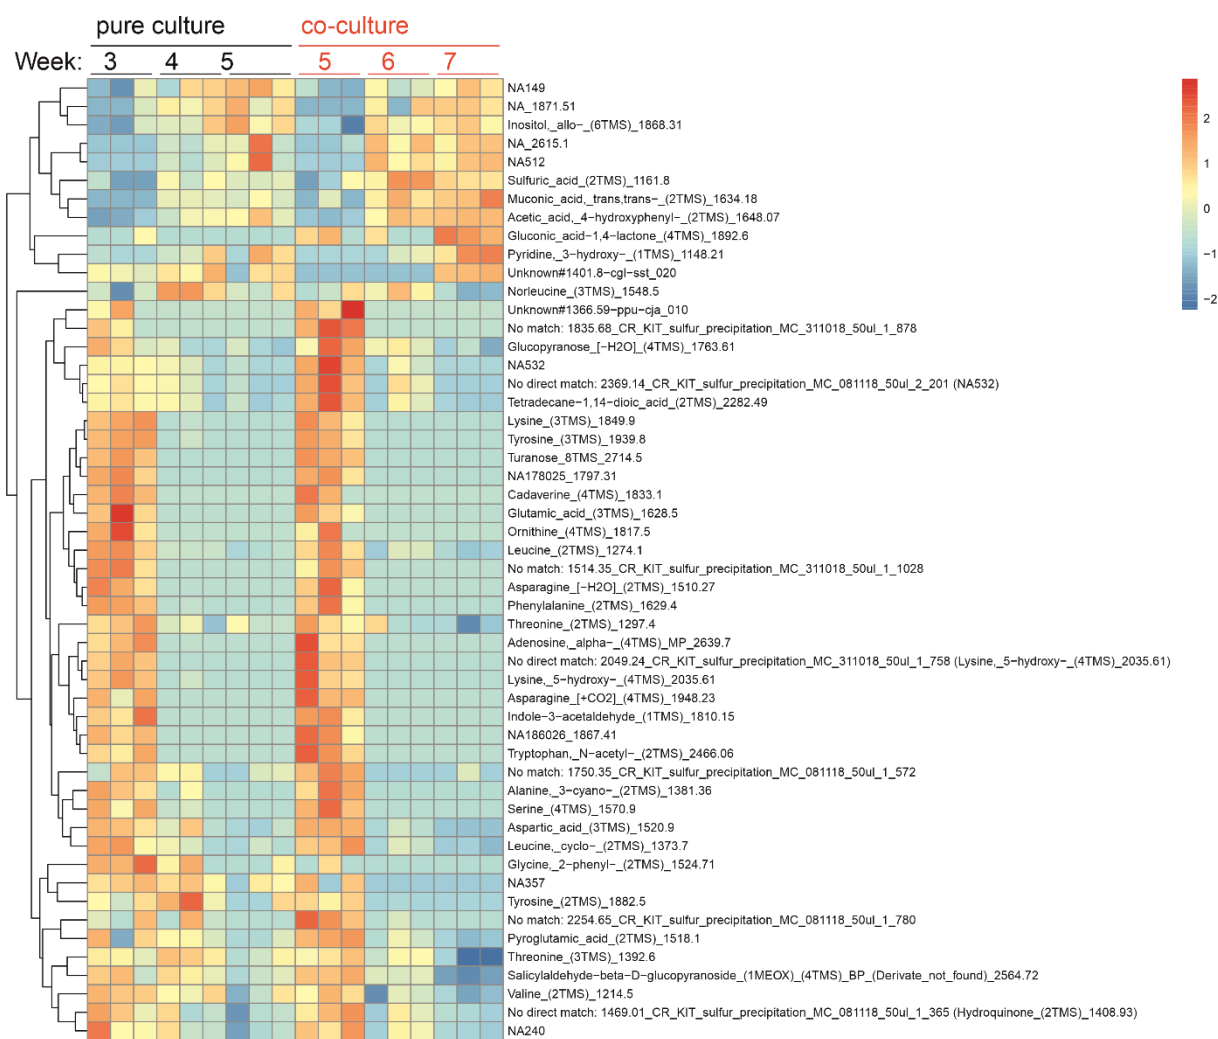

200

201 Figure 1: Heatmap showing significantly different metabolite levels ( $p < 0.01$ ) between corresponding growth  
 202 phases of pure culture (B\_DKE) and co-culture (A\_DKE/B\_DKE). Normalization was done using a z-score, and  
 203 significance was calculated by a two-tailed t-test.

204

205 Tyrosine levels were found to decrease faster in the co-culture, whereas 4-  
 206 hydroxyphenyl acetic acid, an intermediate of the tyrosine degradation pathway, increased.  
 207 Hence, tyrosine degradation seems to be accelerated in the co-culture. Both A\_DKE and  
 208 B\_DKE encode enzymes catalyzing the conversion of tyrosine to 4-hydroxyphenylpyruvate  
 209 (Supplementary table S1) and the presence of the Micrarchaeon might be the reason for faster  
 210 tyrosine depletion. Note, the specific genes for the carboxylase and dehydrogenase reaction  
 211 from 4-hydroxyphenylpyruvate to 4-hydroxyphenyl acetic acid are currently unknown. While

212 2-phenylglycine, a degradation product of phenylalanine that enters the ketoadipate pathway,  
213 decreased, muconic acid, an intermediate of that pathway, increased in the co-culture. Still, we  
214 could neither identify genes involved in the degradation of 2-phenylglycine nor for a complete  
215  $\beta$ -ketoadipate pathway in A\_DKE or B\_DKE (Supplementary Table S1). Moreover, the  $\beta$ -  
216 ketoadipate pathway operates under oxic conditions and the organisms were cultivated in the  
217 absence of oxygen. Hence, so far, we cannot explain the consumption and production of 2-  
218 phenylglycine and muconic acid, respectively. The analyses also revealed increased levels of  
219 gluconic acid in the co-culture, which may be a product of sugar-degradation, for instance from  
220 the biofilm EPS matrix <sup>26</sup>. Genomic information indicates that B\_DKE is able to degrade  
221 glucose into glucono-1,5-lactone (KO: K18124), which can spontaneously be converted into  
222 gluconic acid (Supplementary Table S1). Both organisms possess the enzymes to convert  
223 gluconic acid to glycerate, as already discussed above.

224 Overall, the analysis reveals that the pattern of metabolites does not seem to deviate  
225 between isolated B\_DKE and co-culture and that the kinetics of consumption show minor  
226 differences towards faster consumption of some compounds in the co-culture. Hence, either  
227 both organisms employ similar pathways and compounds or, perhaps more likely, A\_DKE  
228 predominantly uses metabolites provided by B\_DKE. The latter assumption is in agreement  
229 with the sparsity of transporters encoded in the A\_DKE genome and indications for cell-cell  
230 interactions among the two organisms.

231

### 232 **Membrane lipids of A\_DKE and B\_DKE and lipid biosynthetic pathways**

233 An analysis of the intact polar lipids (IPLs) of co-cultures of A\_DKE and B\_DKE revealed the  
234 membrane archaeal isoprenoidal glycerol dibiphytanyl glycerol (GDGT) with zero  
235 cyclopentane rings (i.e. GDGT-0, also known as caldarchaeol) as the main lipid, making up to  
236 97 % of the total intact polar lipids, together with a minor amount of archaeol (2,3-di-O-  
237 phytanyl glycerol diether) (Supplementary Table S2). Comparison of the results to the pure

238 B\_DKE-culture revealed no differences in the relative abundance of the archaeal IPLs,  
239 suggesting that the Micrarchaeon A\_DKE has an identical membrane lipid composition as its  
240 host B\_DKE.

241 Archaeal membrane lipids are formed by isoprenoid side chains linked through ether  
242 bonds to glycerol-1-phosphate (G1P, synthesized by the G1P-dehydrogenase<sup>27</sup>) either as a  
243 bilayer of diethers (archaeols) or a monolayer of tetraethers (i.e. GDGTs). The isoprenoid  
244 building blocks are synthesized by one of the four variants of the archaeal mevalonate (MVA)  
245 pathway, which differ with regard to the enzymes mediating the last three enzymatic steps (see  
246 <sup>28</sup> for a review). Figure 2 shows an overview of the different MVA pathways known. The  
247 isoprenoid C20 units are linked to the G1P backbone through ether bonds by the  
248 geranylgeranylglyceryl diphosphate (GGGP) synthase and (S)-2,3-di-O-  
249 geranylgeranylglyceryl diphosphate (DGGGP) synthase.

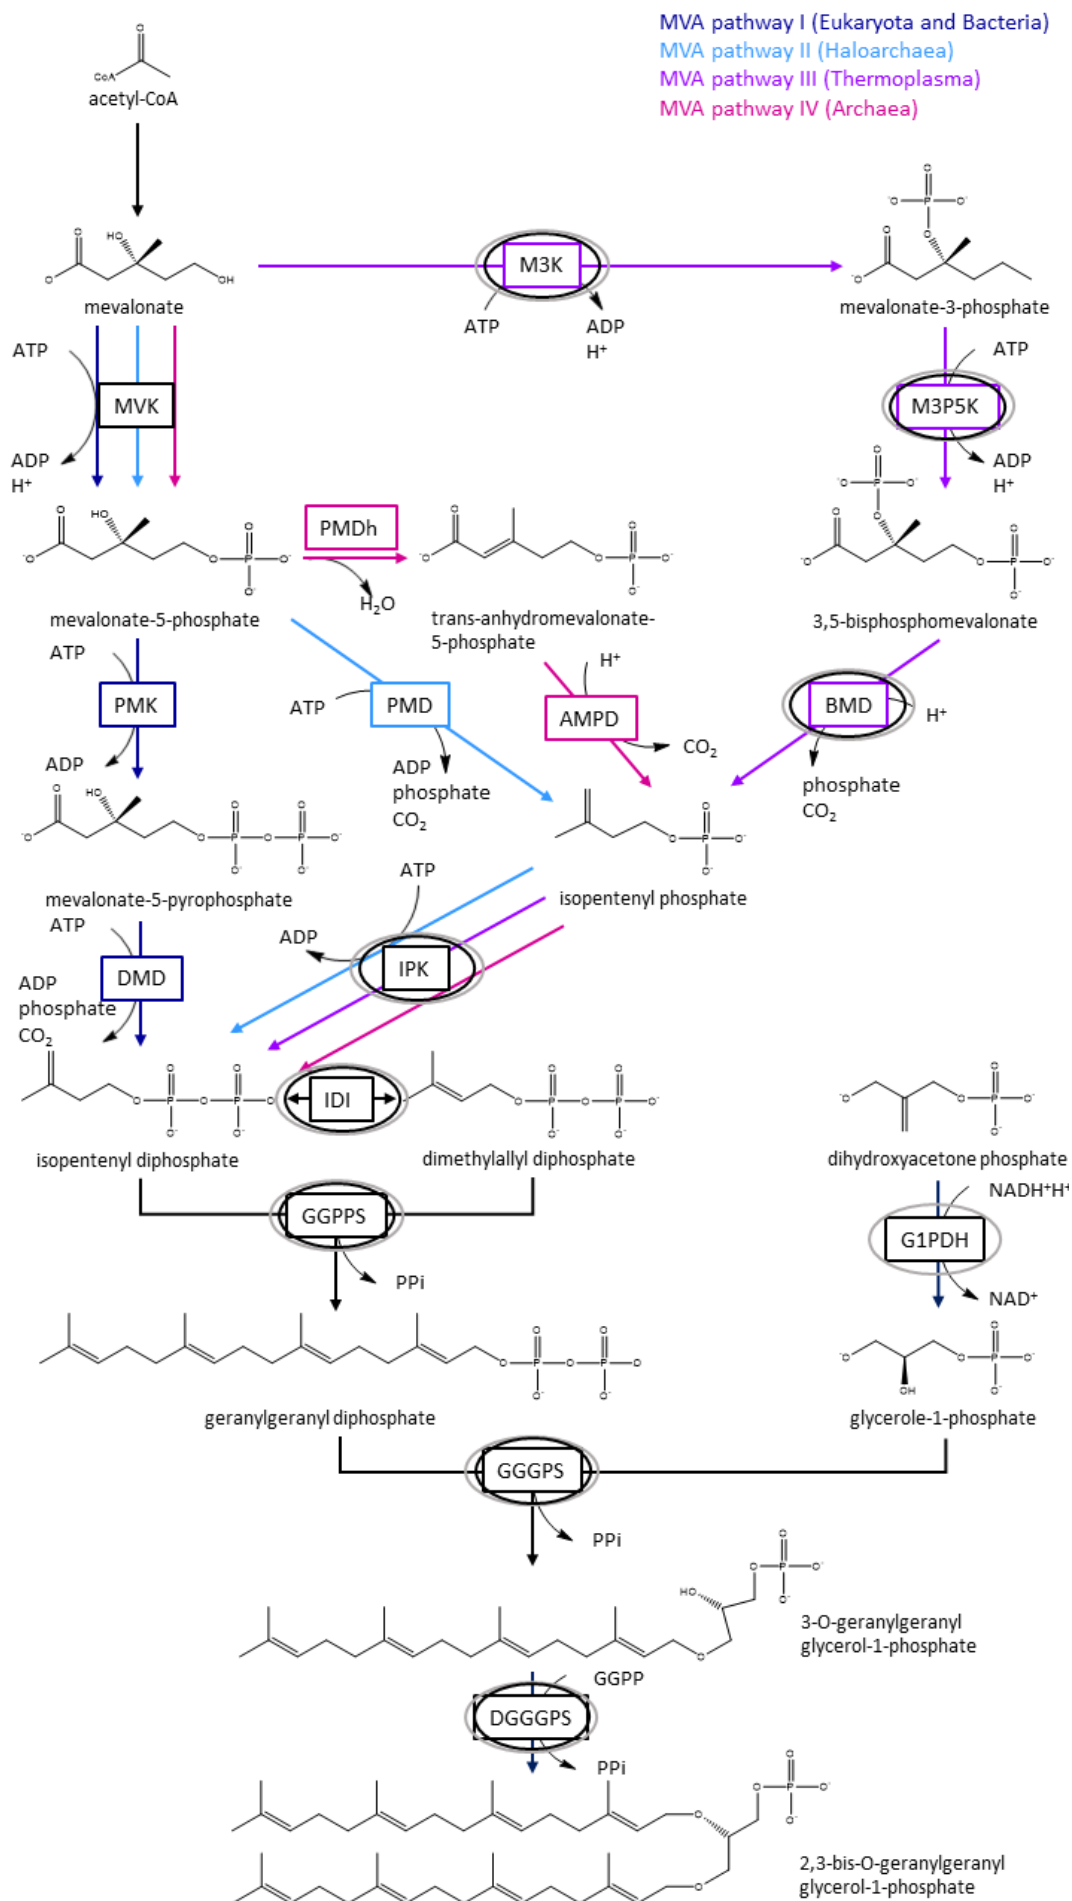

251 Figure 2: Schematic overview of mevalonate pathways and lipid metabolism. The different pathways are indicated  
252 with dark blue (MVA pathway I), light blue (MVA pathway II), violet (MVA pathway III) and magenta arrows  
253 (MVA pathway IV), respectively. Names of enzymes are boxed. Enzymes expressed in A\_DKE and B\_DKE are  
254 indicated with black and grey circles. Abbreviations are AMPD: anhydromevalonate phosphate decarboxylase;  
255 BMD: bisphosphomevalonate decarboxylase; DGGGPS: 2,3-bis-O-geranylgeranyl glycerol-1-phosphate  
256 synthase; DMD: diphosphomevalonate decarboxylase; GGGPS: 3-O-geranylgeranyl glycerol-1-phosphate  
257 synthase; GGPP: geranylgeranyl diphosphate; GGPPS: geranylgeranyl diphosphate synthase; G1PDH: glycerol-  
258 1-phosphate dehydrogenase; IDI: isopentenyl-diphosphate-delta-isomerase; IPK: isopentenyl phosphate kinase;  
259 MVK: mevalonate kinase; M3K: mevalonate 3-kinase; M3P5K: mevalonate 3-phosphate 5-kinase; PMD:  
260 phosphomevalonate decarboxylase; PMK: phosphomevalonate kinase.

261 The genome data (Supplementary Tables S3-S5) revealed that B\_DKE uses variant-III  
262 of the MVA pathways first described in *Thermoplasma acidophilum*<sup>29</sup>. In particular, B\_DKE  
263 encodes the three key enzymes mevalonate-3-kinase (arCOG02937), mevalonate-3-phosphate-  
264 5-kinase (COG02074), and mevalonate-3,5-bisphosphate-decarboxylase (arCOG02937),  
265 characterizing this pathway, while it lacks genes for a canonical mevalonate kinase  
266 (Supplementary Tables S3-S4) similar to other members of the acidophilic Thermoplasmatales  
267 (Vinokur *et al.*, 2016). Prenyltransferases found in the genome are farnesyl diphosphate  
268 synthase and geranyl-geranyl diphosphate synthase. Also, a G1P-DH (i.e. glycerol-1-phosphate  
269 dehydrogenase) could be identified. Genes encoding enzymes for the ether bond formation (i.e.  
270 GGGP and DGGGP synthase) and saturation of isoprenoids (i.e. geranylgeranyl reductases) are  
271 also encoded in the B\_DKE genome (see Supplementary Table S5). In contrast, A\_DKE has an  
272 incomplete mevalonate and archaeal lipid pathway (Supplementary Tables S3-S4). In  
273 particular, while an ancestor of A\_DKE and some other Micrarchaeota are likely to have  
274 acquired three key genes of the variant-III mevalonate pathway from Thermoplasmatales  
275 archaea (i.e. mevalonate-3-kinase (arCOG02937), mevalonate-3-phosphate-5-kinase  
276 (COG02074), and mevalonate-3,5-bisphosphate-decarboxylase (arCOG02937)) (Figure 3),  
277 A\_DKE lacks a homolog of the hydroxymethylglutaryl-CoA reductase (Supplementary Table

278 S3). Note, its genome does not provide any evidence for the presence of another variant of the  
 279 mevalonate pathway (Supplementary Table S3). Furthermore, A\_DKE does not appear to  
 280 encode a G1PDH. One of the encoded geranylgeranyl reductase homologs of A\_DKE, likely  
 281 involved in lipid biosynthesis, also seems to be acquired by horizontal gene transfer (HGT)  
 282 from Thermoplasmatales (arCOG00570) (Figure 3).  
 283

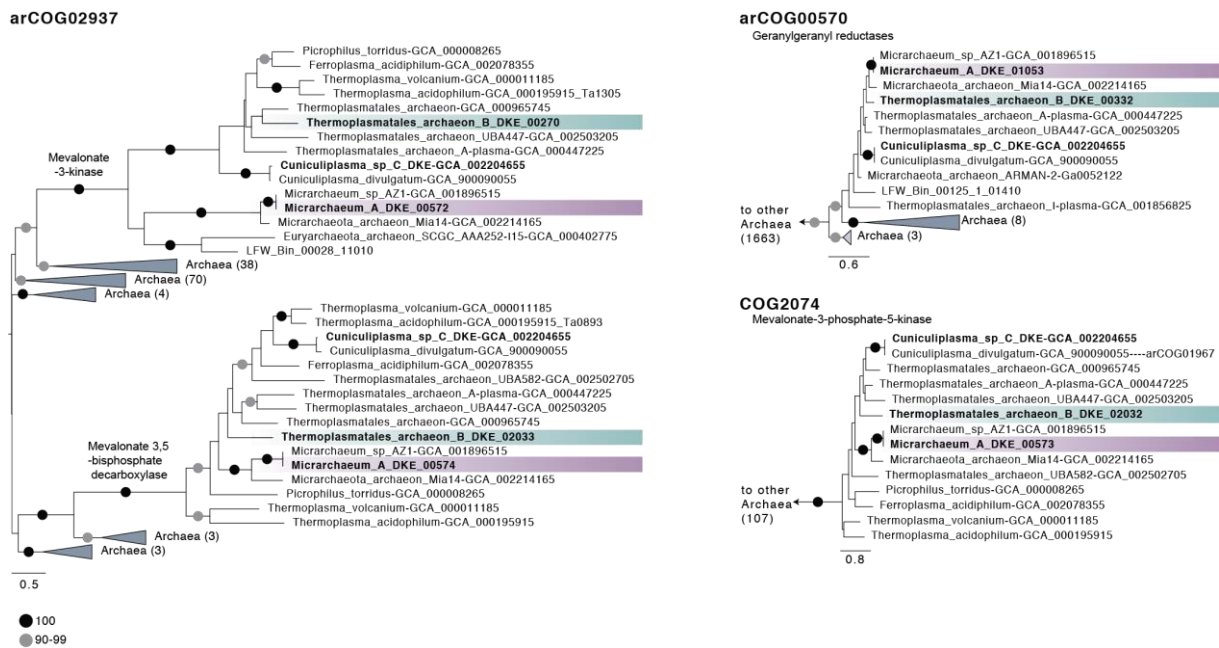

284  
 285  
 286 Figure 3. Schematic trees of three protein families with indications for gene transfers between acidophilic  
 287 Micrarchaeota and Thermoplasmatales. The Maximum likelihood phylogenetic trees shown here included our  
 288 archaeal backbone dataset (Supplementary Table S6) and were inferred for arCOG02937 (149 sequences with 304  
 289 amino acids), arCOG00570 (1877 sequences with 132 amino acids) and COG2074 (arCOG01968 and  
 290 arCOG01967, 121 sequences with 171 amino acids) with the LG+C10+F+R model with an ultrafast bootstrap  
 291 approximation run with 1000 replicates. Please note, that the inclusions of bacterial and eukaryotic homologs did  
 292 not change the interpretation of our findings. Note that arCOG02937 and arCOG02074 represent the key enzymes  
 293 of the Type-III mevalonate pathway characteristic of Thermoplasmatales. Only bootstrap support values above 90  
 294 are shown as indicated in the panel.

295 Together with our experimental data, the presence of an incomplete variant-III  
 296 mevalonate and lipid biosynthesis pathways in A\_DKE, indicates that this organism depends

297 on lipids or precursors thereof from its host, similar to what has been previously described in  
298 the DPANN archaeon *N. equitans*<sup>31</sup> and likely other DPANN members such as  
299 *Nanohaloarchaeum antarcticus*<sup>16</sup>.

300

### 301 **Biofilm composition of pure and co-cultures**

302 As the isolation experiments and our previous results point towards the importance of  
303 extracellular polymeric substances (EPS) for successful cultivation of A\_DKE, we next  
304 investigated the composition of the EPS matrix in the co-culture as compared to the pure culture  
305 of B\_DKE. To this end the glycoconjugates were analyzed with fluorescently labeled lectins,  
306 and the signals were correlated to the individual cell type by CARD-FISH analysis (Figure 4).  
307 Lectins are complex proteins, which bind specifically to carbohydrate structures<sup>32</sup>. In this  
308 study, 70 different fluorescently labeled lectins, which represent all commercially available  
309 lectins available so far (Supplementary Table S7), were used to analyze the EPS in pure and  
310 co-cultures.

311



312

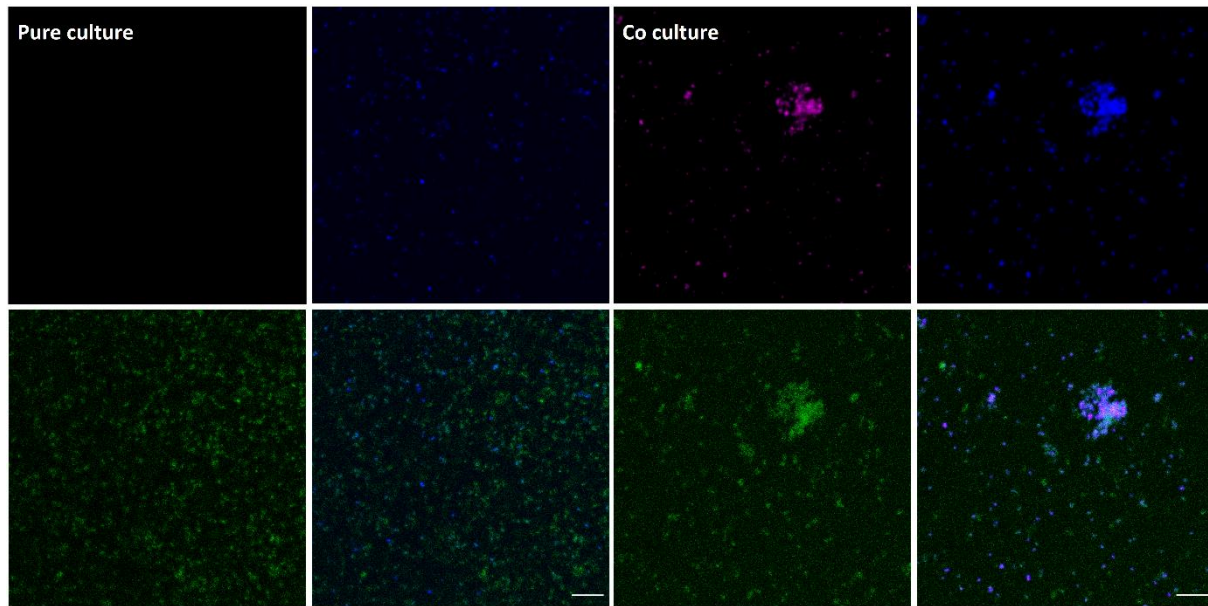

313

| Lectin | Single-sugar binding specificity                                | Pure culture | Co-culture |       |
|--------|-----------------------------------------------------------------|--------------|------------|-------|
|        |                                                                 |              | B_DKE      | A_DKE |
| AAL    | $\alpha$ -Fucose                                                | +            | +          | -     |
| CA     | Lactose>N-Acetyl-Galactosamine<br>>Galactose and related sugars | ++           | ++         | -     |
| GNA    | Mannose                                                         | +            | ++         | +     |
| GS-I   | Galactose, N-Acetyl-Galactosamine                               | +            | +          | -     |
| HHA    | Mannose                                                         | ++           | -          | +     |
| HPA    | N-Acetyl-Galactosamine                                          | ++           | +          | +     |
| IAA    | not determined                                                  | ++           | ++         | -     |
| PTA    | Galactose, N-Acetyl-Galactosamine                               | +            | -          | -     |
| RCA    | $\beta$ -Galactose, Lactose                                     | +            | +          | +     |
| RPA    | N-Acetyl-D-Galactosamine                                        | ++           | ++         | -     |
| SSA    | $\alpha$ -N-Acetyl-Galactosamine                                | +            | ++         | +     |
| TKA    | Galactose                                                       | -            | ++         | -     |

314

315 Figure 4: Results of lectin staining of co-culture of A\_DKE and B\_DKE and B\_DKE pure culture. Upper part

316 shows an example of the microscopic analysis of the pure culture (left) and co-culture (right). The images show

317 the results for staining with lectin CA (co-culture) and HHA (pure culture). Color allocation: B\_DKE was stained

318 with the general Archaea probe Arch915 (blue) which does not stain A\_DKE. A\_DKE was stained using the

319 Micrarchaeota-specific ARMAN980 probe (red). Lectin staining is shown in green. Scale bars represent 10  $\mu$ m.

320 The table shows binding lectins, their carbohydrate-binding specificity, and the strength of the signal in pure and

321 co-culture (with + as weak binding, ++ as binding, and - as no binding).

322

323 Among the tested lectins, only those specific to galactose- and mannose-related

324 conjugates bound the extracellular matrix of the co-culture and of B\_DKE cells in pure culture.

325 Notably, lectins, IAA, HHA, and PTA seemed to discriminate between the extracellular matrix

325 of B\_DKE in the presence or absence of A\_DKE, suggesting a potential influence of A\_DKE  
326 on the matrix chemistry or composition. Lectin staining of A\_DKE cells was weak and only  
327 possible with some of the lectins that bound to B\_DKE. This may reflect the inability of A\_DKE  
328 to build carbohydrate polymers or the production of a sort of exotic polymer for which we did  
329 not have a lectin. It suggests that the detected signals on A\_DKE are likely due to growth within  
330 the biofilm matrix of B\_DKE.

331 Overall, the results indicate that B\_DKE displays galactose and mannose on its cell  
332 surface and that these carbohydrates are also components of the co-culture EPS matrix. This is  
333 corroborated by the presence of transcriptionally expressed genes for metabolic pathways  
334 leading to UDP-glucose, UDP-galactose, GDP-mannose, UDP-N-acetylgalactosamine, and N-  
335 acetylglucosamine in the genome of B\_DKE (see Supplementary Table S8 and Supplementary  
336 Figure S3).

337

### 338 **Evidence for direct cell-cell interactions between A\_DKE and B\_DKE**

339 Due to the pleomorphic morphology and great variability in cell size of members of the  
340 Thermoplasmatales including B\_DKE, it was previously challenging to clearly distinguish  
341 symbiont and host cells on electron micrographs. Recently,<sup>33</sup> has shown that A\_DKE cells are  
342 characterized by the presence of an S-layer that can be observed on electron micrographs of  
343 Platinum-Carbon shadowed samples. Hence, we conducted an electron microscopic study to  
344 test whether the two organisms indeed physically interact as indicated by our various analyses  
345 (see above). Electron micrographs revealed the attachment of several A\_DKE to B\_DKE cells,  
346 suggesting direct cell-cell interactions between these organisms, as was previously shown for  
347 *N. equitans* and *I. hospitalis*<sup>21,22</sup> (Figure 5). However, we also observed a large number of  
348 A\_DKE cells that were not in contact with their potential host organism, which is in agreement  
349 with observations from microscopic images of CARD-FISH stained cultures. While we cannot  
350 exclude that this is (to some degree) a result of sample preparation, it is possible that growth in

351 the biofilm enables a more dynamic interaction between A\_DKE and B\_DKE than observed  
352 for *N. equitans* and *I. hospitalis*<sup>21,22</sup>, as the risk of detaching from the host is mitigated by  
353 growth within the biofilm matrix. Moreover, A\_DKE has a larger genome and in turn greater  
354 metabolic flexibility than *N. equitans*<sup>34</sup> and may in turn be less dependent on permanent  
355 attachment to host cells. Finally, we detected several unattached A\_DKE cells in the process of  
356 cell division suggesting that A\_DKE can store a sufficient amount of building blocks to divide  
357 without being in direct cell-cell contact with B\_DKE.

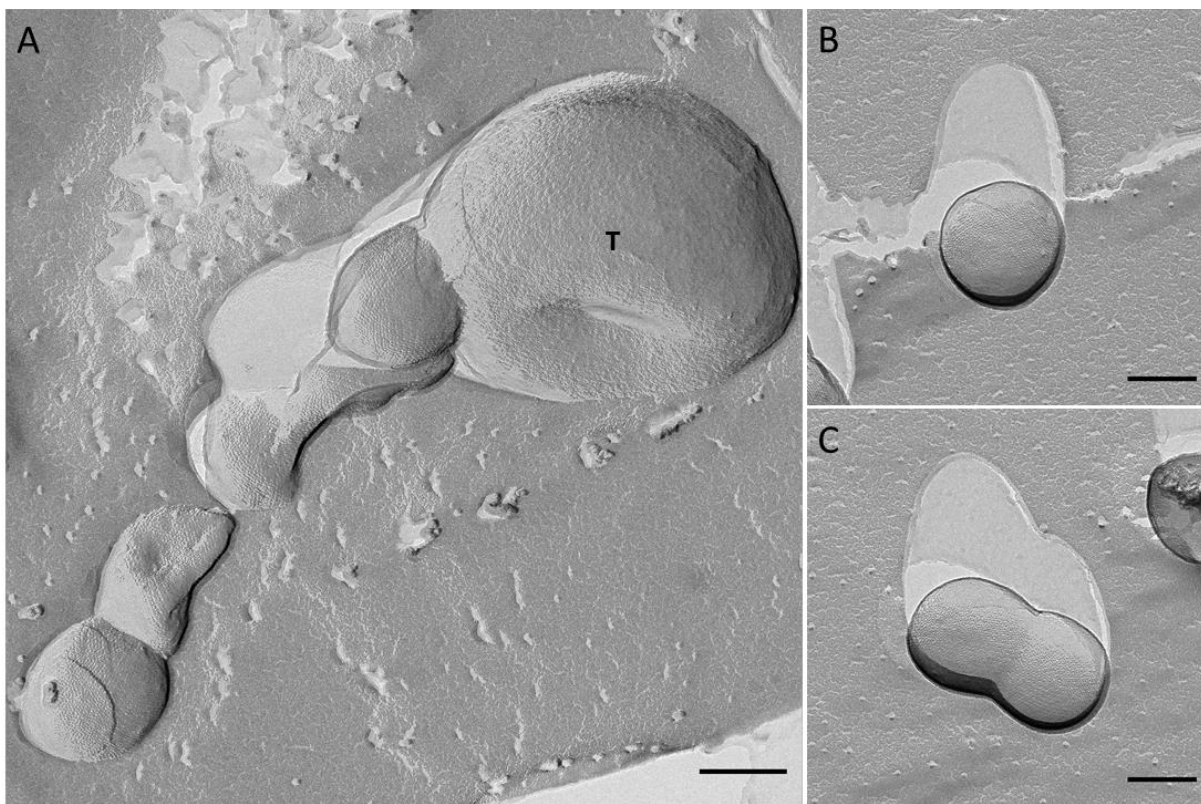

358  
359 Figure 5: Electron micrographs of freeze-etched, Platinum-Carbon shadowed co-culture cells, containing  
360 ‘*Candidatus Scheffleriplasma hospitalis*’ B\_DKE and ‘*Candidatus Micrarchaeum harzensis*’ A\_DKE. A\_DKE  
361 cells, displaying an S-Layer on their surface, were observed in physical contact with B\_DKE cells (tagged with T)  
362 (A), as well as free living (B) and undergoing cell division (C). Scale bars equal 200 nm.

363

364

## 365 **Conclusion**

366 Previous attempts to purify members of the Micrarchaeota with their respective hosts yielded  
367 in relatively diverse enrichments or led to the disappearance of the symbiont after some time of  
368 incubation<sup>14,18,19</sup>. Here we used physiology informed strategies for deselection against  
369 additional community members and show that selection for biofilm formation of the B\_DKE  
370 host population was crucial for obtaining a stable co-culture. The detailed characterization of  
371 our co-culture in comparison with pure host cultures using for instance transcriptomic,  
372 metabolomic and lipid analyses indicate a specific regulatory response of B\_DKE as a  
373 consequence of growth with A\_DKE. These characterizations also suggest a dynamic physical  
374 interaction of the symbiont and host organisms that is likely crucial for the uptake of various  
375 metabolites and building blocks for among others membrane formation. The close cell-cell  
376 interactions between acidophilic Micrarchaeota and Thermoplasmatales may also provide a  
377 route for horizontal gene transfer among these DPANN symbionts and their hosts (Figure 4).  
378 The robust growth of our culture and the possibility to upscale the growth experiments to a  
379 fermenter scale provides the basis for prospective work aiming to unravel further insights into  
380 the details of the symbiosis between the acidophilic Micrarchaeota A\_DKE and its  
381 Thermoplasmatales host. On a broader scale, it will be an important step to compare cell-cell  
382 interactions underlying this system to the various addition symbioses involving cultivated  
383 DPANN archaea and their hosts and establish unique and common characteristics<sup>12-14,16,17</sup>.

## 384 **Materials and Methods**

### 385 **Culturing conditions**

386 All cultures were cultivated under anoxic conditions in a modified *Picrophilus* medium at a pH  
387 of 2.0 or 2.5 and at 22 °C as previously described<sup>15</sup>. Transfers of the cultures were conducted  
388 with 20 % of the pre-culture. The growth phase was assessed by following the reduction of  
389 ferric iron via the ferrozine assay<sup>35</sup>. Furthermore, the cultures were monitored regarding their  
390 activity via CARD-FISH (see below). The cultures typically reached the exponential growth  
391 phase after incubation for 2-8 weeks.

392

### 393 **CARD-FISH and Lectin staining**

394 Samples were fixed for 1 h in 4 % formaldehyde, washed twice in phosphate-buffered saline  
395 (PBS), and stored at -20 °C in 50:50 PBS/ethanol for CARD-FISH analysis or at 4 °C in 100 %  
396 PBS for lectin staining. The fixed cells were hybridized and further processed as described  
397 previously<sup>15,36</sup>. Labeling was conducted using HRP-labelled 16S rDNA probes TH1187  
398 (*Thermoplasmatales*, GTA CTG ACC TGC CGT CGA C, 20 % formamide;<sup>37</sup>) and ARM980  
399 (*ARMAN*, GCC GTC GCT TCT GGT AAT, 30 % formamide;<sup>38</sup>). For standard CARD-FISH  
400 staining, Alexa546 and Alexa488 fluorophores were used, and counterstaining was conducted  
401 with DAPI. CARD-FISH staining for lectin analysis was conducted using Alexa546 and  
402 Alexa647 fluorophores; see below for more details. Slides were visualized on a Leica DM  
403 5500B microscope (objective lens 100×: HCX PL FLUOTAR, 1.4, oil immersion and objective  
404 lens 64x: HCX PL APO; eyepiece 10x: HC PLAN s (25) M), and images were taken with a  
405 Leica DFC 360 FX CCD camera and the corresponding Leica LAS AF software.

406         Lectin staining was conducted according to a protocol of Neu and Kuhlicke (2017). The  
407 positive lectin results were compared with CARD-FISH staining of the same slides, using a  
408 protocol of Bennke *et al.* (2013). CARD-FISH staining was performed as described above with  
409 the following modifications: 1) the low melting agarose and all ethanol washing steps were

410 omitted, as these would negatively affect the lectin staining<sup>40</sup>; 2) cells were not counterstained  
411 with DAPI. After fixation and staining via CARD-FISH, the samples were dried at 37 °C, and  
412 100 µl lectin solution (0.1 mg/mL) was added and incubated for 30 min at room temperature in  
413 the dark. After washing with PBS solution, the slides were dried at 37 °C and mounted in the  
414 same embedding buffer as used for CARD-FISH. Please refer to Supplementary Table S7 for  
415 an overview of lectins used. Imaging was conducted as described above.

416

### 417 **DNA/RNA isolation and quantitative PCR analysis**

418 Isolation of DNA for quantitative (qPCR) analysis was conducted with the Invisorb Spin  
419 Forensic Kit following the manufacturer's instructions (Invitek, Berlin). DNA for Illumina and  
420 PacBio sequencing was isolated as described by Lo *et al.* (2017). RNA isolation and library  
421 preparation was conducted by IMG/M laboratories GmbH using the RNeasy Micro Kit (Qiagen,  
422 Hilden) and TruSeq® Stranded total RNA LT kit according to the manufacturer's instructions  
423 (illumina, Berlin). All sequencing analyses were conducted with samples of exponentially  
424 growing pure host cultures as well as symbiont-host co-cultures. The ratio of the Micrarchaeon  
425 A\_DKE to the Thermoplasmatales archaeon B\_DKE was calculated via qPCR using standard  
426 curves, as described in Krause *et al.* (2017). The primer sequences are listed in Supplementary  
427 Table S9.

428

### 429 **Metagenome analysis**

430 A SMRTbell™ template library was prepared according to the instructions from  
431 PacificBiosciences, Menlo Park, CA, USA, following the Procedure & Checklist – Greater  
432 Than 10 kb Template Preparation. Briefly, for preparation of 15 kB libraries, DNA was end-  
433 repaired and ligated overnight to hairpin adapters applying components from the  
434 DNA/Polymerase Binding Kit P6 from Pacific Biosciences, Menlo Park, CA, USA. Reactions  
435 were carried out according to the manufacturer's instructions. BluePippin™ Size-Selection to

436 greater than 4 kb was performed according to the manufacturer's instructions (Sage Science,  
437 Beverly, MA, USA). Conditions for annealing of sequencing primers and binding of  
438 polymerase to purified SMRTbell™ template were assessed with the Calculator in RS Remote,  
439 PacificBiosciences, Menlo Park, CA, USA. One SMRT cell was sequenced on the PacBio RSII  
440 (PacificBiosciences, Menlo Park, CA, USA), taking one 240-min movie. Libraries for  
441 sequencing on the Illumina platform were prepared to apply the Nextera XT DNA Library  
442 Preparation Kit (Illumina, San Diego, USA) with modifications according to Kishony *et al.*<sup>42</sup>  
443 and sequenced on Illumina NextSeq™ 500 (Illumina, San Diego, USA).

444 Genome assembly was performed by applying the RS\_HGAP\_Assembly.3 protocol  
445 included in the SMRT Portal version 2.3.0. The assembly revealed two major contigs.  
446 Potentially misassembled artificial contigs with low coverage and included in other replicons  
447 were removed from the assembly. Redundancies at the ends of the two major contigs allowed  
448 them to be circularized. Replicons were adjusted to *smc* (chromosome partition protein Smc)  
449 as the first gene. Error-correction was performed by mapping of the Illumina short reads onto  
450 finished genomes using the Burrows-Wheeler Aligner bwa 0.6.2 in paired-end mode using  
451 default settings<sup>43</sup> with subsequent variant and consensus calling using VarScan 2.3.6  
452 (Parameters: mpileup2cns --min-coverage 10 --min-reads 2 6 --min-avg-qual 20 --min-var-freq  
453 0.8 --min-freq-for-hom 0.75 --p-value 0.01 --strand-filter 1 --variants 1 --output-vcf 1)<sup>44</sup>.  
454 Automated genome annotation was carried out using Prokka 1.8<sup>45</sup>.

455

## 456 **Genome annotations**

457 For further functional annotation, the protein files from the two complete genomes as well as  
458 22 Micrarchaeota and 11 Thermoplasmatales reference genomes (Supplementary Table S6)  
459 were compared against several databases, including the Archaeal Clusters of Orthologous  
460 Genes (arCOGs<sup>46</sup>; version from 2018), the KO profiles from the KEGG Automatic Annotation  
461 Server (KAAS<sup>47</sup>; downloaded April 2019), the Pfam database (<sup>48</sup>Release 31.0), the TIGRFAM

462 database (<sup>49</sup> Release 15.0), the Carbohydrate-Active enZymes (CAZy) database (<sup>50</sup> downloaded  
463 from dbCAN2 in September 2019), the Transporter Classification Database (TCDB <sup>51</sup>;  
464 downloaded in November 2018), the hydrogenase database (HydDB <sup>52</sup>; downloaded in  
465 November 2018) and NCBI\_nr (downloaded in November 2018). Hmmssearch v3.1b298 was  
466 used to read HMM profiles of the ArCOG, PFAM, TIGRFAM and CAZyme databases and  
467 search against a protein database (settings: hmmssearch <hmmfile> <seqdb> -E 1e-4 <sup>53</sup>). The  
468 best hit for each protein was selected based on the highest e-value and bitscore by using a  
469 custom script (hmmssearchTable, available at <https://zenodo.org/record/3839790> <sup>7</sup>). BlastP was  
470 used with TCBD, HydDB and NCBI\_nr as input databases and the protein sequences as query  
471 (settings: -evalue 1e-20 -outfmt 6). Additionally, all proteins were scanned for protein domains  
472 using InterProScan (v5.29-68.0; settings: --iprlookup --goterms <sup>54</sup>). For InterProScan we report  
473 multiple hits corresponding to the individual domains of a protein using a custom script  
474 (parse\_IPRdomains\_vs2\_GO\_2.py) (Supplementary Tables S3 and S4). All custom scripts are  
475 available at <https://zenodo.org/record/3839790> <sup>7</sup>.

476

## 477 **Phylogenetic analyses**

478 We performed phylogenetic analyses of membrane lipid biosynthetic proteins, whenever  
479 homologs of relevant arCOGs were present in both A\_DKE and B\_DKE to assess the extent of  
480 horizontal gene transfer (HGT) affecting these proteins (Supplementary Table S5). In  
481 particular, we extracted homologs of corresponding arCOGs for all of these proteins from  
482 A\_DKE, B\_DKE, a reference set of 566 archaeal genomes (archaea-only analysis) as well as  
483 from an additional of 3020 bacterial and 100 eukaryotic genomes (universal analysis)  
484 (Supplementary Table S6). The reference genomes were annotated as described above. For the  
485 archaea-only analysis, the individual homologs for each protein family were aligned using  
486 MAFFT L-INS-i v7.407 (settings: --reorder <sup>55</sup>), trimmed with BMGE v1.12 (settings: -t AA -  
487 m BLOSUM30 -h 0.55 <sup>56</sup>). Subsequently, phylogenetic trees were inferred using IQ-TREE



488 (v1.6.10, settings: -m LG+C10+F+R -wbtl -bb 1000 -bnni <sup>57</sup>). For the universal analysis,  
489 MAFFT L-INS-i v7.407 and MAFFT v7.407 were used to align protein families with  
490 Less/equal ( $\leq$ ) or more ( $>$ ) than 1000 homologs, respectively. BMGE v1.12 was used for  
491 trimming all alignments (settings: -t AA -m BLOSUM30 -h 0.55 <sup>56</sup>) and phylogenetic trees  
492 were inferred using IQ-TREE (v1.6.10, settings: -m LG+C10+F+R -wbtl -bb 1000 -bnni <sup>57</sup>).  
493 Due to the large number of sequences affiliating with arCOG00570 when including bacterial  
494 and eukaryotic homologs (i.e. 13381), sequences for this protein family were aligned using  
495 MAFFT v7.407, trimmed with TrimAL (v1.2rev59, settings: -gappycout <sup>58</sup>). Sequences with =>  
496 90 % gaps were removed using a custom script (faa\_drop.py) and used for a phylogenetic  
497 analysis with FastTree (v2.1.10, settings: -lg -gamma).

498

#### 499 **Transcriptomic analysis**

500 Sequencing of RNA samples of three replicates of the pure culture and four replicates of the  
501 co-culture was performed on an Illumina NextSeq® 500 NGS system using 2 x 75 bp paired-  
502 end read chemistry. All samples were taken from cultures in exponential growth phase.  
503 Transcriptomic analyses were performed using Kallist v0.45.0 <sup>59</sup> and compared to the reference  
504 completed genomes (see above). Differential expression was assessed by using the R package  
505 DESeq2 (1.24.0; Love *et al.*, 2014). Log2fold change shrinkage for normalization was  
506 calculated by the ashR program <sup>61</sup>.

507

#### 508 **Lipid analyses**

509 For the analysis of membrane lipids, cells were derived from 20 mL pure and co-culture in the  
510 exponential growth phase. Samples were taken for monitoring of cells via CARD-FISH prior  
511 to filtering (Supplementary Figure S4). Cells were filtered onto 0.3  $\mu$ m pore size 47 mm  
512 diameter glass fiber filters (GF75, Advantec MFS, Inc, CA, USA). Total lipids were extracted  
513 from the freeze-dried glass-fiber filters using a modified Bligh and Dyer method <sup>62</sup>, as described

514 earlier<sup>63</sup>. The extracts were dried under nitrogen and split into two aliquots, one left untreated  
515 and another hydrolyzed with 1.5 M HCl in methanol by reflux at 130 °C for 2 h to remove the  
516 headgroups from the archaeal intact polar lipids (IPL) and release the core lipids (CLs). The pH  
517 was adjusted to 7 by adding 2 M KOH/MeOH (1:1 v/v) and, after the addition of water to a  
518 final 1:1 (v/v) ratio of H<sub>2</sub>O-MeOH, extracted three times with dichloromethane (DCM). The  
519 DCM fractions were collected and dried over sodium sulfate. The dried samples were dissolved  
520 in hexane–2-propanol (99:1, vol/vol) and filtered over a 0.45-µm polytetrafluoroethylene filter.  
521 The extracts after acid-hydrolysis contained the IPL-derived CLs plus CLs, while the non-  
522 hydrolyzed extracts consisted only of the CLs. Extracts were analyzed by UHPLC–atmospheric  
523 pressure chemical ionization (APCI) MS for archaeal CLs, including archaeol (diether, C<sub>20</sub>  
524 isoprenoid chains) and glycerol dialkyl glycerol tetraether (GDGTs, tetraether, C<sub>40</sub> side chain),  
525 according to Hopmans *et al.* (2016), with some modifications. Briefly, the analysis was  
526 performed on an Agilent 1260 UHPLC coupled to a 6130 quadrupole MSD in selected ion  
527 monitoring (SIM) mode. This allowed the detection of GDGTs with 0 to 4 cyclopentane  
528 moieties, crenarchaeol as well as archaeol. The separation was achieved on two UHPLC silica  
529 columns (BEH HILIC columns, 2.1 × 150 mm, 1.7 µm; Waters) in series, fitted with a 2.1 × 5-  
530 mm pre-column of the same material (Waters) and maintained at 30 °C. Archaeal CLs were  
531 eluted isocratically for 10 min with 10 % B, followed by a linear gradient to 18 % B in 20 min,  
532 then a linear gradient to 100 % B in 20 min, where A is hexane and B is hexane:isopropanol  
533 (9:1). The flow rate was 0.2 mL/min. Total run time was 61 min with a 20 min re-equilibration.  
534 Source settings were identical to Schouten *et al.* (2007). The typical injection volume was 10  
535 µl of a 1 mg/mL solution (weighted dried Bligh and Dyer extract dissolved in  
536 hexane:isopropanol (99:1, v/v ratio). The m/z values of the protonated molecules of archaeol  
537 and GDGTs were monitored. GDGTs were quantified by adding a C<sub>46</sub> GTGT internal standard  
538 <sup>66</sup>. A response factor derived from an archaeol:GDGT-0 standard (1:1) was used to correct for  
539 the difference in ionization between archaeol and GDGTs.

540 The Bligh and Dyer extract (non-hydrolyzed) and the acid-hydrolyzed Bligh and Dyer  
541 extract were also analyzed using ultra-high-performance liquid chromatography coupled to  
542 positive ion atmospheric pressure chemical ionization/Time-of-Flight mass spectrometry  
543 (UHPLC-APCI/ToFMS) on an Agilent 1290 Infinity II UHPLC, equipped with an automatic  
544 injector, coupled to a 6230 Agilent TOF MS and Mass Hunter software. This additional analysis  
545 was performed to detect other archaeal lipids that were not included in the SIM method on the  
546 6130 quadrupole MSD mentioned above. Separation of the archaeal lipids was achieved  
547 according to Hopmans *et al.* (2016) with some modifications using two silica BEH HILIC  
548 columns in series (2.1 × 150 mm, 1.7 μm; Waters) at a temperature of 25 °C. The injection  
549 volume was 10 μL. Compounds were isocratically eluted with 90 % A and 10 % B for the first  
550 10 min, followed by a gradient to 18 % B in 15 min, a gradient to 30 % B in 25 min, and a  
551 linear gradient to 100 % B in 30 min. A = hexane and B = hexane/isopropanol (9:1, v/v) and  
552 the flow rate was 0.2 mL/min. The conditions for the APCI source were identical to Schouten  
553 *et al.* (2007) and Hopmans *et al.* (2016). Also, the fragmentor was set at 300 V. The ToFMS  
554 was operated in extended dynamic range mode (2 GHz) with a scan rate of 2 Hz. We assessed  
555 archaeal lipid distributions by monitoring m/z 600 to 1400. Archaeal lipids were identified by  
556 searching within 10 ppm mass accuracy for relevant [M+H]<sup>+</sup> signals.

557

### 558 **Metabolome analysis**

559 A pure culture of B\_DKE and a co-culture of A\_DKE and B\_DKE were inoculated as described  
560 above for 42 (pure culture) or 49 days (co-culture) until all available ferric iron was reduced  
561 and stationary phase was reached. Experiments were performed in triplicates. For metabolomic  
562 examination, 1 mL culture was sampled and stored at -80 °C until further analyses. Samples  
563 were taken every 7 days, along with samples for ferrous iron quantification to estimate growth,  
564 and samples for DNA extraction and CARD-FISH for further detection of A\_DKE and B\_DKE.  
565 Due to the low pH of the culture medium, 500 μl samples were amended by inducing sulfur

566 precipitation through the addition of a spatula tip of CaCO<sub>3</sub> to each sample, mixing for 5 min  
567 at 2000 rpm at room temperature. This treatment also led to cell lysis so that the analysis  
568 included also intracellular metabolites. After centrifugation for 5 min at 14000 rpm at room  
569 temperature, 50 µl of the supernatant was transferred to glass vials and dried under vacuum at  
570 4 °C. Dried samples were stored at -80 °C until further analysis.

571 Online metabolite derivatization was performed using a Gerstel MPS2 autosampler  
572 (Muehlheim, Germany). Dried metabolites were dissolved in 15 µl of 2 % methoxyamine  
573 hydrochloride in pyridine at 40 °C under shaking. After 90 min, an equal volume of N-Methyl-  
574 N-(trimethylsilyl)trifluoroacetamide (MSTFA) was added and held for 30 min at 40 °C. One µl  
575 of the sample was injected into an SSL injector at 270 °C in splitless mode. Gas  
576 chromatography/mass spectrometry (GC/MS) analysis was performed using an Agilent 7890A  
577 GC equipped with a 30-m DB-35MS # 5-m Duraguard capillary column. Helium was used as  
578 carrier gas at a flow rate of 1.0 mL/min. The GC oven temperature was held at 100 °C for 2  
579 min and increased to 300 °C at 10 K/min. After 3 min, the temperature was increased to 325  
580 °C. The GC was connected to an Agilent 5975C inert XL MSD, operating under electron  
581 ionization at 70 eV. The MS source was held at 230 °C and the quadrupole at 150 °C. The total  
582 run time of one sample was 60 min. All GC/MS chromatograms were processed by using the  
583 Metabolite Detector software<sup>67</sup>.

584

585 **Structural analysis by electron microscopy**

586 For freeze-etching, both a pure culture of B\_DKE and a co-culture of A\_DKE and B\_DKE  
587 were concentrated by centrifugation (3,000 x g). The concentrated cell pellet (1.5 µL) was  
588 applied onto a gold carrier, frozen in liquid nitrogen, and transferred into a freeze-etching device  
589 (CFE-50, Cressington, Watford, UK;  $p < 10^{-5}$  mbar). At  $T=176$  K, samples were fractured using  
590 a cold knife ( $T=90$  K); after sublimation of about 400 nm of surface water, the samples were  
591 shadowed with Platinum-Carbon at an angle of 45 degrees (1.5 nm), and an additional layer of  
592 pure Carbon (about 15 nm; both by electron-beam evaporation). Replicas were cleaned for 15  
593 hours on 70 % H<sub>2</sub>SO<sub>4</sub>, washed three times on bidistilled water, taken up on 700 mesh (hex)  
594 grids and air-dried. For electron microscopy analysis at 200 kV, a transmission electron  
595 microscope JEM-2100F (JEOL GmbH, Freising, Germany), equipped with a F416 CMOS  
596 camera (TVIPS, Gauting, Germany) under control of SerialEM v. 3.8<sup>68</sup> was used.

597

598 **Accession of data**

599 The genome sequences including annotations have been deposited at NCBI Genbank under  
600 Accession Numbers CP060530 and CP060531. Raw reads of transcriptomic data are available  
601 under SRA files SRX8933312-SRX8933318. All raw files phylogenetic trees can be found in  
602 a repository (doi: 10.5281/zenodo.4725436).

603 **Acknowledgements**

604 The authors thank Carola Berg for excellent technical assistance.

605 **References**

- 606 1. Huber, H. *et al.* A new phylum of Archaea represented by a nanosized hyperthermophilic  
607 symbiont. *Nature* **417**, 63–67 (2002).
- 608 2. Rinke, C. *et al.* Insights into the phylogeny and coding potential of microbial dark matter.  
609 *Nature* **499**, 431–437 (2013).
- 610 3. Castelle, C. J. *et al.* Genomic expansion of domain Archaea highlights roles for  
611 organisms from new phyla in anaerobic carbon cycling. *Curr. Biol.* **25**, 690–701 (2015).
- 612 4. Probst, A. J. *et al.* Differential depth distribution of microbial function and putative  
613 symbionts through sediment-hosted aquifers in the deep terrestrial subsurface. *Nat.*  
614 *Microbiol.* **3**, 328–336 (2018).
- 615 5. Baker, B. J. *et al.* Enigmatic, ultrasmall, uncultivated Archaea. *Proc. Natl. Acad. Sci. U.*  
616 *S. A.* **107**, 8806–8811 (2010).
- 617 6. Probst, A. J. *et al.* Biology of a widespread uncultivated archaeon that contributes to  
618 carbon fixation in the subsurface. *Nat. Commun.* **5**, 5497 (2014).
- 619 7. Dombrowski, N. *et al.* Undinarchaeota illuminate DPANN phylogeny and the impact of  
620 gene transfer on archaeal evolution. *Nat. Commun.* **11**, 3939 (2020).
- 621 8. Castelle, C. J. & Banfield, J. F. Major new microbial groups expand diversity and alter  
622 our understanding of the tree of life. *Cell* **172**, 1181–1197 (2018).
- 623 9. Castelle, C. J. *et al.* Protein family content uncovers lineage relationships and bacterial  
624 pathway maintenance mechanisms in DPANN archaea. *bioRxiv* 2021.01.12.426361  
625 (2021) doi:10.1101/2021.01.12.426361.
- 626 10. Dombrowski, N., Lee, J.-H., Williams, T. A., Offre, P. & Spang, A. Genomic diversity,  
627 lifestyles and evolutionary origins of DPANN archaea. *FEMS Microbiol. Lett.* **366**,  
628 (2019).
- 629 11. Ghuneim, L.-A. J., Jones, D. L., Golyshin, P. N. & Golyshina, O. V. Nano-sized and  
630 filterable Bacteria and Archaea: Biodiversity and function. *Front. Microbiol.* **9**, 1971  
631 (2018).

- 632 12. Wurch, L. *et al.* Genomics-informed isolation and characterization of a symbiotic  
633 Nanoarchaeota system from a terrestrial geothermal environment. *Nat. Commun.* **7**, 1–  
634 10 (2016).
- 635 13. St. John, E. *et al.* A new symbiotic nanoarchaeote (*Candidatus* Nanoclepta minutus) and  
636 its host (*Zestosphaera tikiterensis* gen. nov., sp. nov.) from a New Zealand hot spring.  
637 *Syst. Appl. Microbiol.* **42**, 94–106 (2018).
- 638 14. Golyshina, O. V *et al.* Mysterious ‘ARMAN’ archaea depend on association with  
639 euryarchaeal host in culture *in situ*. *Nat. Commun.* 1–11 (2017) doi:10.1038/s41467-017-  
640 00104-7.
- 641 15. Krause, S., Bremges, A., Münch, P. C., McHardy, A. C. & Gescher, J. Characterisation  
642 of a stable laboratory co-culture of acidophilic nanoorganisms. *Sci. Rep.* **7**, 1–13 (2017).
- 643 16. Hamm, J. N. *et al.* Unexpected host dependency of Antarctic Nanohaloarchaeota. *Proc.*  
644 *Natl. Acad. Sci.* **116**, 14661 LP – 14670 (2019).
- 645 17. La Cono, V. *et al.* Symbiosis between nanohaloarchaeon and haloarchaeon is based on  
646 utilization of different polysaccharides. *Proc. Natl. Acad. Sci.* **117**, 20223 LP – 20234  
647 (2020).
- 648 18. Chen, L.-X. *et al.* Metabolic versatility of small Archaea Micrarchaeota and  
649 Parvarchaeota. *ISME J.* 1 (2017) doi:10.1038/s41396-017-0002-z.
- 650 19. Golyshina, O. V *et al.* Diversity of ‘Ca. Micrarchaeota’ in Two Distinct Types of Acidic  
651 Environments and Their Associations with Thermoplasmatales. *Genes (Basel)*. **10**, 1–11  
652 (2019).
- 653 20. Golyshina, O. V *et al.* The novel extremely acidophilic, cell-wall-deficient archaeon  
654 *Cuniculiplasma divulgatum* gen. nov., sp. nov. represents a new family,  
655 Cuniculiplasmataceae fam. nov., of the order Thermoplasmatales. *Int. J. Syst. Evol.*  
656 *Microbiol.* **66**, 332–340 (2016).
- 657 21. Jahn, U. *et al.* *Nanoarchaeum equitans* and *Ignicoccus hospitalis*: New insights into a  
658 unique, intimate association of two Archaea. *J. Bacteriol.* **190**, 1743 LP – 1750 (2008).
- 659 22. Heimerl, T. *et al.* A complex endomembrane system in the Archaeon *Ignicoccus*  
660 *hospitalis* tapped by *Nanoarchaeum equitans*. *Front. Microbiol.* **8**, 1072 (2017).



- 661 23. Jarrell, K. F. & Albers, S.-V. The archaeellum: an old motility structure with a new name.  
662 *Trends Microbiol.* **20**, 307–312 (2012).
- 663 24. Golyshina, O. V. *et al.* Biology of Archaea from a novel family Cuniculiplasmataceae  
664 (Thermoplasmata) ubiquitous in hyperacidic environments. *Sci. Rep.* **6**, 39034 (2016).
- 665 25. Yelton, A. P. *et al.* Comparative genomics in acid mine drainage biofilm communities  
666 reveals metabolic and structural differentiation of co-occurring Archaea. *BMC Genomics*  
667 **14**, 485 (2013).
- 668 26. Kopp, D., Willows, R. & Sunnar, A. Characterisation of the first archaeal mannonate  
669 dehydratase from *Thermoplasma acidophilum* and its potential role in the catabolism of  
670 D-mannose. *Catalysts* 1–14 (2019).
- 671 27. Koga, Y. & Morii, H. Biosynthesis of ether-type polar lipids in Archaea and evolutionary  
672 considerations. *Microbiol. Mol. Biol. Rev.* **71**, 97–120 (2007).
- 673 28. Jain, S., Caforio, A. & Driessen, A. Biosynthesis of archaeal membrane ether lipids.  
674 *Front. Microbiol.* **5**, 641 (2014).
- 675 29. Vinokur, J. M., Korman, T. P., Cao, Z. & Bowie, J. U. Evidence of a novel mevalonate  
676 pathway in archaea. *Biochemistry* **53**, 4161–4168 (2014).
- 677 30. Vinokur, J. M., Cummins, M. C., Korman, T. P. & Bowie, J. U. An adaptation to life in  
678 acid through a novel mevalonate pathway. *Sci. Rep.* **6**, 1–11 (2016).
- 679 31. Jahn, U., Summons, R., Sturt, H., Grosjean, E. & Huber, H. Composition of the lipids of  
680 *Nanoarchaeum equitans* and their origin from its host *Ignicoccus sp.* strain KIN4/I. *Arch.*  
681 *Microbiol.* **182**, 404–413 (2004).
- 682 32. Neu, T. R., Swerhone, G. D. W. & Lawrence, J. R. Assessment of lectin-binding analysis  
683 for in situ detection of glycoconjugates in biofilm systems. *Microbiology* **147**, 299–313  
684 (2001).
- 685 33. Gfrerer, S. *et al.* Micrarchaeota are covered by a proteinaceous S-Layer. Unpublished
- 686 34. Waters, E. *et al.* The genome of *Nanoarchaeum equitans*: Insights into early archaeal  
687 evolution and derived parasitism. *Proc. Natl. Acad. Sci.* **100**, 12984 LP – 12988 (2003).

- 688 35. Stookey, L. L. Ferrozine - a new spectrophotometric reagent for iron. *Anal. Chem.* **42**,  
689 779–781 (1970).
- 690 36. Pernthaler, A., Pernthaler, J. & Amann, R. Sensitive multi-color fluorescence *in situ*  
691 hybridization for the identification of environmental microorganisms. *Mol. Microb.*  
692 *Ecol. Man.* **3**, 711–726 (2004).
- 693 37. Bond, P. L. & Banfield, J. F. Design and performance of rRNA targeted oligonucleotide  
694 probes for *in situ* detection and phylogenetic identification of microorganisms inhabiting  
695 acid mine drainage environments. *Microb. Ecol.* **41**, 149–161 (2001).
- 696 38. Baker, B. J. *et al.* Lineages of acidophilic Archaea revealed by community genomic  
697 analysis. *Science* **314**, 1933–1935 (2006).
- 698 39. Neu, T. & Kuhlicke, U. Fluorescence lectin bar-coding of glycoconjugates in the  
699 extracellular matrix of biofilm and bioaggregate forming microorganisms.  
700 *Microorganisms* **5**, 5 (2017).
- 701 40. Bennke, C. M., Neu, T. R., Fuchs, B. M. & Amann, R. Mapping glycoconjugate-  
702 mediated interactions of marine Bacteroidetes with diatoms. *Syst. Appl. Microbiol.* **36**,  
703 417–425 (2013).
- 704 41. Lo, I. *et al.* Strain-resolved community proteomics reveals recombining genomes of  
705 acidophilic Bacteria. *Nature* **446**, 537–541 (2007).
- 706 42. Baym, M. *et al.* Inexpensive multiplexed library preparation for megabase-sized  
707 genomes. *PLoS One* **10**, 1–15 (2015).
- 708 43. Li, H. & Durbin, R. Fast and accurate long-read alignment with Burrows-Wheeler  
709 transform. *Bioinformatics* **26**, 589–595 (2010).
- 710 44. Wilson, R. K. *et al.* VarScan 2: Somatic mutation and copy number alteration discovery  
711 in cancer by exome sequencing. *Genome Res.* **22**, 568–576 (2012).
- 712 45. Seemann, T. Prokka: Rapid prokaryotic genome annotation. *Bioinformatics* **30**, 2068–  
713 2069 (2014).
- 714 46. Makarova, K., Wolf, Y. & Koonin, E. Archaeal Clusters of Orthologous Genes  
715 (arCOGs): An update and application for analysis of shared features between

- 716 Thermococcales, Methanococcales, and Methanobacteriales. *Life* **5**, 818–840 (2015).
- 717 47. Aramaki, T. *et al.* KofamKOALA: KEGG Ortholog assignment based on profile HMM  
718 and adaptive score threshold. *Bioinformatics* **36**, 2251–2252 (2020).
- 719 48. Bateman, A. *et al.* The Pfam protein families database. *Nucleic Acids Res.* **32**, D138–  
720 D141 (2004).
- 721 49. Haft, D. H., Selengut, J. D. & White, O. The TIGRFAMs database of protein families.  
722 *Nucleic Acids Res.* **31**, 371–373 (2003).
- 723 50. Yin, Y. *et al.* dbCAN: a web resource for automated carbohydrate-active enzyme  
724 annotation. *Nucleic Acids Res.* **40**, W445–W451 (2012).
- 725 51. Saier, M. H., Tran, C. V & Barabote, R. D. TCDB: the Transporter Classification  
726 Database for membrane transport protein analyses and information. *Nucleic Acids Res.*  
727 **34**, D181–D186 (2006).
- 728 52. Søndergaard, D., Pedersen, C. N. S. & Greening, C. HydDB: A web tool for hydrogenase  
729 classification and analysis. *Sci. Rep.* **6**, 34212 (2016).
- 730 53. Finn, R. D., Clements, J. & Eddy, S. R. HMMER web server: interactive sequence  
731 similarity searching. *Nucleic Acids Res.* **39**, W29–W37 (2011).
- 732 54. Jones, P. *et al.* InterProScan 5: genome-scale protein function classification.  
733 *Bioinformatics* **30**, 1236–1240 (2014).
- 734 55. Katoh, K., Misawa, K., Kuma, K. & Miyata, T. MAFFT: a novel method for rapid  
735 multiple sequence alignment based on fast Fourier transform. *Nucleic Acids Res.* **30**,  
736 3059–3066 (2002).
- 737 56. Criscuolo, A. & Gribaldo, S. BMGE (Block Mapping and Gathering with Entropy): a  
738 new software for selection of phylogenetic informative regions from multiple sequence  
739 alignments. *BMC Evol. Biol.* **10**, 210 (2010).
- 740 57. Nguyen, L.-T., Schmidt, H. A., von Haeseler, A. & Minh, B. Q. IQ-TREE: A fast and  
741 effective stochastic algorithm for estimating Maximum-likelihood phylogenies. *Mol.*  
742 *Biol. Evol.* **32**, 268–274 (2015).

- 743 58. Capella-Gutiérrez, S., Silla-Martínez, J. M. & Gabaldón, T. trimAl: a tool for automated  
744 alignment trimming in large-scale phylogenetic analyses. *Bioinformatics* **25**, 1972–1973  
745 (2009).
- 746 59. Bray, N. L., Pimentel, H., Melsted, P. & Pachter, L. Near-optimal probabilistic RNA-seq  
747 quantification. *Nat. Biotechnol.* **34**, 525–527 (2016).
- 748 60. Love, M. I., Huber, W. & Anders, S. Moderated estimation of fold change and dispersion  
749 for RNA-seq data with DESeq2. *Genome Biol.* **15**, 1–21 (2014).
- 750 61. Stephens, M. False discovery rates: A new deal. *Biostatistics* **18**, 275–294 (2017).
- 751 62. Bligh, E. G., Dyer, W. J. A rapid method of total lipid extraction and purification. *Can.*  
752 *J. Biochem. Physiol.* **37**, 911–917 (1959).
- 753 63. Lengger, S. K. *et al.* Intact polar and core glycerol dibiphytanyl glycerol tetraether lipids  
754 in the Arabian Sea oxygen minimum zone. Part II: Selective preservation and  
755 degradation in sediments and consequences for the TEX86. *Geochim. Cosmochim. Acta*  
756 **98**, 244–258 (2012).
- 757 64. Hopmans, E. C., Schouten, S. & Sinninghe Damsté, J. S. The effect of improved  
758 chromatography on GDGT-based palaeoproxies. *Org. Geochem.* **93**, 1–6 (2016).
- 759 65. Schouten, S., Huguet, C., Hopmans, E. C., Kienhuis, M. V. M. & Sinninghe Damsté, J.  
760 S. Analytical methodology for TEX86 paleothermometry by high-performance liquid  
761 chromatography/atmospheric pressure chemical ionization-mass spectrometry. *Anal.*  
762 *Chem.* **79**, 2940–2944 (2007).
- 763 66. Huguet, C. *et al.* An improved method to determine the absolute abundance of glycerol  
764 dibiphytanyl glycerol tetraether lipids. *Org. Geochem.* **37**, 1036–1041 (2006).
- 765 67. Hiller, K. *et al.* Metabolite detector: Comprehensive analysis tool for targeted and  
766 nontargeted GC/MS based metabolome analysis. *Anal. Chem.* **81**, 3429–3439 (2009).
- 767 68. Mastrorarde, D. N. Automated electron microscope tomography using robust prediction  
768 of specimen movements. *J. Struct. Biol.* **152**, 36–51 (2005).

769
